1 Aldo-keto reductase 1C inhibitors could reverse resistance  
2 of HepG2 Cis-platin-resistant cells, but not only by  
3 inhibiting AKR1Cs, based on transcriptomic and NADH  
4 metabolic analysis

5 Tingting Sun<sup>a</sup>, Le Gao<sup>a</sup>, Xue Sun<sup>a</sup>, Xin Wang<sup>a</sup>, Rui Guo<sup>a</sup>, Yuanhua Yu<sup>a\*</sup>

6 <sup>a</sup> Changchun University of Science and Technology, Changchun, 130022, P.R.  
7 China.

8 \*Corresponding author

9 Yuanhua Yu

10 Changchun University of Science and Technology, 130022 Changchun, Jilin  
11 Province, P. R. China

12 Tel: +8613596050433

13 Fax: +86-0431-85583099

14 E-mail: yuyuanhua8888@126.com

15

16 Abstract:

17 Aldo-keto oxidoreductase (AKR) inhibitors could reverse several cancer  
18 cells' resistance to Cis-platin, but their role in resistance remains unclear. Our  
19 RNA-seq results showed de novo NAD biosynthesis-related genes, and  
20 NAD(P)H-dependent oxidoreductases were significantly upregulated in Cis-

21 platin-resistant HepG2 hepatic cancer cells (HepG2-RC cells) compared with  
22 HepG2 cells. Knockdown of AKR1Cs could increase Cis-platin sensitivity in  
23 HepG2-RC cells about two-fold. Interestingly, the AKR1C inhibitor meclofenamic  
24 acid could increase Cis-platin sensitivity of HepG2-RC cells about eight-fold,  
25 indicating that knockdown of AKR1Cs only partially reversed the resistance.  
26 Meanwhile, the amount of total NAD and the ratio of NADH/NAD<sup>+</sup> were  
27 increased in HepG2-RC cells compared with HepG2 cells. The increased NADH  
28 could be explained as a directly operating antioxidant to scavenge radicals  
29 induced by Cis-platin. We report here that NADH, which is produced by  
30 NAD(P)H-dependent oxidoreductases, plays a key role in the AKR-associated  
31 Cis-platin resistance of HepG2 hepatic cancer cells.

32       Keywords: Aldo-keto oxidoreductase (AKR); RNA sequencing; NAD(P)H-  
33 dependent oxidoreductases; Cis-platin; HepG2

## 34 1. Introduction

35       Aldo-keto reductases (AKRs) are NAD(P)H-dependent oxidoreductases,  
36 which reduce carbonyl substrates with NAD(P)H and are present in all three  
37 domains of life. Human AKRs are important in metabolic pathways such as  
38 steroid biosynthesis, alcohol oxidation, and xenobiotic elimination[1]. Some  
39 AKRs, such as AKR1B10[2] and AKR1Cs[3,4], are correlated with  
40 carcinogenesis. AKR1Cs have also been related to Cis-platin resistance in  
41 gastric carcinoma TSGH-S3 cells[5] and metastatic bladder cancer cells[6].

42 Cis-platin is a front-line chemotherapy agent for cancer treatment[7]. The  
43 AKR1C inhibitor flufenamic acid was found useful to reverse Cis-platin  
44 resistance of bladder cancer[6]. It was speculated that AKR1Cs could reduce  
45 some cytotoxic lipid peroxidative products from aldehydes[5]. Hepatic cancer  
46 cells with high expression levels of AKRs usually show a rather high tolerance  
47 to Cis-platin treatment. However, the target molecule of AKRs remains unknown.  
48 Here we report that NADH, a product of Aldo-keto oxidation-reduction, plays a  
49 key role in the Cis-platin resistance of HepG2 hepatic cancer cells.

## 50 2. Materials and Methods

### 51 2.1. Cell culture

52 Human hepatic HL-7702 cells and the hepatic cancer cell lines HepG2 and  
53 its Cis-platin-resistant strain HepG2-RC were purchased from Fusheng  
54 Biotechnology (Shanghai, China). HL-7702 cells were cultured at 5% CO<sub>2</sub> in  
55 RPMI-1640 medium. HepG2 cells were cultured at 5% CO<sub>2</sub> in DMEM medium.  
56 HepG2-RC cells were cultured at 5% CO<sub>2</sub> in MEME medium with increasing Cis-  
57 platin concentration until 50% of cells died.

### 58 2.2. Quantitative real-time polymerase chain reaction

59 Total RNA isolation and first-strand cDNA synthesis from HL-7702, HepG2,  
60 and HepG2-RC cells were performed by a SuperReal Kit (Tiangen, Beijing,  
61 China). The primer sequences are listed in Table S1. Quantitative real-time

62 polymerase chain reaction (qRT-PCR) was performed using ABI7900HTFast  
63 (ThermoFisher, Waltham, MA). The data were normalized to the  $\beta$ -actin  
64 expression level and are expressed as the fold change relative to control ( $2^{-\Delta\Delta C_t}$ ).

### 65 2.3. Western blot

66 Cells were washed twice with cold PBS and lysed in a buffer containing 0.5%  
67 NP-40, 10 mM Tris-HCl (pH 7.4), 150 mM NaCl, 1 mM EDTA, 50 mM NaF, 1 mM  
68 PMSF, and 1 mM  $\text{Na}_3\text{VO}_4$ , and the lysate was clarified by centrifugation at  
69 15,000 rpm for 10 min. The supernatants were then subjected to 8%–12% SDS-  
70 PAGE. Separated proteins were transferred to polyvinylidene difluoride  
71 membranes and blocked using Tris-buffered saline containing Tween-20 (TBS-  
72 T) with 5% skim milk at room temperature for 1 h. Membranes were incubated  
73 with the following primary antibodies: anti-AKR1C1 (Abnova, Taiwan, China),  
74 anti-AKR1C2 (Abcam, Cambridge, UK), anti-AKR1C3 (Abcam, Cambridge, UK),  
75 and AKR1C4 (Abnova, Taiwan, China) at 4°C overnight. Membranes were  
76 washed with TBS-T, followed by incubation with responding secondary  
77 antibodies. The membranes were washed three times in TBS-T, and the signal  
78 was developed using ECL (GE Healthcare, Little Chalfont, UK), followed by  
79 detection using an AzureC600 detection system (Azure Biosystems, Dublin, CA).

### 80 2.4. Measuring IC<sub>50</sub> of AKR1C inhibitors

81 The activity of AKR1C3 was estimated by measuring the OD<sub>340</sub> (NADH)

82 during the conversion of glyceraldehyde to glycerol by the Vallee–Hoch method.  
83 Three inhibitors, medroxyprogesterone acetate (MPA), meclofenamic acid  
84 (MCFLA), and methyliasmonate (MLS), were applied to inhibit AKR1C3 activity.  
85 The IC<sub>50</sub> of the inhibitors was calculated from the plots of AKR1C3 activity vs  
86 concentration of inhibitors. Each sample was measured in triplicate.

## 87 2.5. Reverse Cis-platin resistance

88 MPA, MCFLA, and MLS were applied to reverse Cis-platin resistance of  
89 HepG2-RC. The inhibitors at given concentrations (MPA: 0.31 mM, MCFLA: 0.12  
90 mM, MLS: 0.13 mM) were co-incubated with HepG2-RC cells under a gradient  
91 concentration of Cis-platin. The Cis-platin IC<sub>50</sub> of each inhibitor-treated HepG2-  
92 RC sample was then calculated from the MTT assay.

93 For the knockdown of AKR1Cs in HepG2-RC cells. Small interfering RNAs  
94 (siRNAs) targeting human AKR1C1-4 were synthesized by Qiagen (Valencia,  
95 CA). HepG2-RC cells ( $5 \times 10^6$  cells/well) were transfected with 50 nM of si-  
96 AKR1Cs or si-scramble as control (sequences are provided in Table S1) using  
97 HiPerfect transfection reagent (Qiagen, Valencia, CA). After 24 or 48 h  
98 transfection, cells were subjected to RT-PCR and immunoblotting to identify  
99 whether AKR1Cs were knocked down. The HepG2-RC cells in which knockdown  
100 of AKR1Cs was successful then underwent a Cis-platin IC<sub>50</sub> test as described  
101 above.

## 102 2.6. RNA-sequencing and data analysis

103        Approximately  $10^6$  HepG2 and HepG2-RC cells were frozen on dry ice. RNA  
104 extraction, library preparation, RNA-seq, and bioinformatics analysis were  
105 performed at BGI (Shenzhen, China). Each set of cell samples was sequenced  
106 in three independent experiments. Image analysis, base-calling, and filtering  
107 based on fluorescence purity and output of filtered sequencing files were  
108 performed through the Illumina analysis pipeline.

109        The obtained raw reads of HepG2 and HepG2-RC cells were preprocessed  
110 by removing reads containing adapter sequences, reads containing poly-N, and  
111 low-quality reads. Q20 and Q30 were calculated. All six runs of HepG2 and  
112 HepG2-RC samples showed that at least 96% of reads was Q20, and at least  
113 87% was Q30. All downstream analyses were based on high-quality clean reads.  
114 Gene function was annotated based on Gene Ontology (GO) and the Kyoto  
115 Encyclopedia of Genes and Genomes (KEGG). Genes with  $\log_2(\text{fold change}) >$   
116  $1$  and  $\text{FPKM} > 0.1$  were selected as upregulated genes. Genes with  $\log_2(\text{fold}$   
117  $\text{change}) < -1$  and  $\text{FPKM} > 0.1$  were selected as downregulated genes. Finally,  
118 1486 upregulated genes and 270 downregulated genes were identified.

## 119 2.7. Assay of NADH and NAD<sup>+</sup> content

120        The amounts of NADH and NAD<sup>+</sup> were measured by NAD<sup>+</sup>/NADH Assay  
121 Kit with WST-8 (Beyotime, Shanghai, China). Approximately  $10^6$  HL-7702,

122 HepG2, and HepG2-RC cells were collected for NAD<sup>+</sup> or NADH extraction. Each  
123 sample was divided into two equal parts. One part was used for measuring the  
124 total amount of NAD (NAD<sup>+</sup>+NADH), and the other part was used for measuring  
125 the amount of NADH after 60°C heat treatment. In the assay, NAD<sup>+</sup> was first  
126 converted to NADH by adding alcohol dehydrogenase and ethanol. NADH then  
127 reduced WST-8 to formazan, and the amount of NADH could be measured by  
128 monitoring the OD450 value. The ratio of NAD<sup>+</sup>/NADH was calculated by the  
129 formula  $ratio = ([NAD]_{total} - [NADH])/([NADH])$  . Each sample was  
130 measured in three independent experiments.

## 131 2.8. Docking experiment

132 A protein docking model of AKR1C3 and its inhibitors was simulated by  
133 AutoDock 4.2.6 (The Scripps Research Institute, San Diego, CA). The crystal  
134 structure of AKR1C3 was derived from the RCSB protein data bank (ID: 4DBW).  
135 Ligands were initially drawn using ChemBioDraw Ultra 13.0 (PerkinElmer,  
136 Waltham, MA), and energy minimization was performed with ChemBio3D Ultra  
137 13.0 using the MMFF94 force field (PerkinElmer, Waltham, CA). Optimized  
138 ligand candidates were saved in PDBQT format. The dimensions of the grid box  
139 were set at 110, 110, 85 (x, y, z), and the center of the box was placed on Tyr-  
140 55 in the A-chain. MPA, MCFLA, and MLS were designed and docked onto the  
141 AKR1C3 model with or without NADP<sup>+</sup>, and their binding energy was estimated  
142 from docking models.

### 143 3. Results

#### 144 3.1. AKR1C3 was upregulated in HepG2-RC cells compared with HepG2 cells

145 To investigate the differential expression of AKR1Cs in HepG2 and HepG2-  
146 RC cells, we evaluated their mRNA and protein levels. According to the qRT-  
147 PCR results (Table 1), the mRNA levels of all AKR1C isoenzymes were higher  
148 in HepG2 cells compared with human hepatic HL-7702 cells. However, only  
149 AKR1C3 was upregulated in HepG2-RC cells compared with HepG2 cells (~50-  
150 fold), while the other isoenzymes showed decreased levels in HepG2-RC cells.

151 According to our Western blot results (Fig.1), AKR1C1, AKR1C2, and  
152 AKR1C4 levels were almost equal between HepG2 and HepG2-RC cells (1.2-  
153 fold differences). AKR1C3 levels in HepG2-RC cells were as much as 1.5-fold  
154 higher than in HepG2 cells, which was consistent with our qRT-PCR results.

#### 155 3.2. AKR1C inhibitors could reverse Cis-platin resistance of HepG2-RC cells

156 Three AKR1C inhibitors, MPA, MCFLA, and MLS, were applied to reverse  
157 Cis-platin resistance in HepG2-RC cells. First, the IC<sub>50</sub> value of each AKR1C3  
158 inhibitor was determined (Fig. 2A). MPA showed the lowest IC<sub>50</sub> value (2.1 μM).  
159 The IC<sub>50</sub> values of the other inhibitors were 3.3 μM (MCFLA) and 16.3 μM (MLS).  
160 However, MCFLA caused the strongest increase in Cis-platin sensitivity (~8-fold).  
161 MPA and MLS increased Cis-platin sensitivity almost 2.5-fold and approximately  
162 1.5-fold, respectively (Fig. 2B).



### 163 3.3. SiRNA of AKR1Cs could partially reverse resistance of HepG2-RC cells

164 Since AKR1C inhibitors could reverse Cis-platin resistance of HepG2-RC  
165 cells, RNAi knockdown experiments of all AKR1Cs were performed. Western  
166 blot results showed that AKR1C1 and AKR1C3 protein levels were strongly  
167 reduced, while these remained unchanged in control-siRNA HepG2-RC cells  
168 (Fig. 2C). These observations confirm that AKR1C1 and AKR1C3 were  
169 successfully knocked down in HepG2-RC cells.

170 Cis-platin resistance reversal experiments showed that the AKR1C  
171 knockdown HepG2-RC cells could tolerate two-fold lower Cis-platin  
172 concentrations than control HepG2-RC cells (Fig. 2D). The effects of AKR1C  
173 knockdown on Cis-platin resistance were equivalent to the effects of MPA (~2.5-  
174 fold reversal), but were much weaker than the effects of MCFLA (~8-fold  
175 reversal), indicating that knockdown of AKR1Cs could partially reverse Cis-platin  
176 resistance of HepG2-RC cells.

### 177 3.4. Most NAD(P)H-dependent reductase/oxidases were upregulated in HepG2- 178 RC cells

179 According to our RNA-seq results, AKR1C levels were not greatly changed  
180 in HepG2-RC cells ( $\log_2(\text{HEPG2-RC}/\text{HEPG2}) < 2$ ; Table 2), and only AKR1C3  
181 showed a slight increase, while the other three showed a slight decrease. This  
182 tendency was consistent with the above qRT-PCR results. Among the 16 human

183 AKR enzymes, four (AKR1B10, AKR1B15, AKR1D1, and AKR1B1) were  
184 upregulated about four-fold, while two (AKR1E2 and AKR1C4) were  
185 downregulated about twofold; the remaining nine enzymes showed almost no  
186 change.

187 Moreover, many other NAD(P)H-dependent reductase/oxidases were  
188 upregulated four- to eight-fold (Table 2). The strongest upregulation was  
189 observed for RFTN1 ( $\log_2(\text{HEPG2-RC}/\text{HEPG2}) = 6.55$ ), which encodes raftlin,  
190 which bears NAD(P)H cytochrome-b5 reductase activity. Comparing RNA-seq  
191 results from HepG2 and HepG2-RC cells, 63 NAD(P)H-dependent  
192 reductase/oxidases were upregulated in HepG2-RC cells at least twofold, while  
193 only 23 were downregulated at least/approximately twofold. Moreover, 23 of  
194 those 63 upregulated genes had at least four-fold higher transcription in HepG2-  
195 RC cells compared with HepG2 cells, while only two of those 23 downregulated  
196 genes showed a reduction to less than 25% of HepG2 levels. In other words,  
197 even though no NAD(P)H-dependent reductase/oxidases were present in the  
198 top 10 upregulated genes (Tables S3 and S4), they were generally upregulated.

199 3.5. Ratio of NADH/NAD<sup>+</sup> in HepG2-RC cells was higher than in HepG2 cells

200 As shown in Fig. 3, the amount of total NAD in HepG2 and HepG2-RC cells  
201 was approximately four-fold higher than in HL-7702 cells. Interestingly, the ratio  
202 of NADH/NAD<sup>+</sup> in HepG2-RC cells was almost seven-fold higher than in HepG2  
203 or HL-7702 cells. These results could be explained by the RNA-seq results that

204 de novo NAD biosynthesis-related genes were upregulated in HepG2-RC cells  
205 (Table 3). Especially, TDO2, encoding tryptophan dioxygenase; KYNU, encoding  
206 kynureninase; and NMNAT2, encoding nicotinamide nucleotide adenylyl  
207 transferase, showed at least four-fold and at most 32-fold higher mRNA levels  
208 in HepG2-RC than in HepG2 cells. Moreover, almost all genes involved in NAD  
209 degradation did not show altered mRNA levels, except the ART family. All ART  
210 family genes were upregulated in HepG2-RC compared with HepG2; in  
211 particular, ART1 mRNA levels in HepG2-RC cells increased 32-fold compared  
212 with HepG2 cells. It has been reported that ART1 overexpression is closely  
213 related to some kinds of cancer[8-10]. In summary, the de novo NAD  
214 biosynthesis pathway was upregulated in HepG2-RC, and total NAD levels were  
215 increased in HepG2 and HepG2-RC cells compared with HL-7702 cells.

216 3.6 AKR1C inhibitors could bind with AKR1C3 at different locations, as predicted  
217 by molecular docking stimulations

218 Docking simulations with an NADP<sup>+</sup>-bound AKR1C3 model (Fig. 4A–C)  
219 showed that the highest affinity docking inhibitor was MPA, with the lowest  
220 binding free energy ( $\Delta G = -11.54$  kcal/mol). MCFLA showed the second highest  
221 affinity, with  $\Delta G = -7.06$  kcal/mol, and MLS showed the lowest affinity ( $-6.47$   
222 kcal/mol). These results are consistent with the IC<sub>50</sub> values of the inhibitors on  
223 AKR1C3, with MPA having the lowest and MLS having the highest IC<sub>50</sub> value  
224 (Fig. 2A).

225           If NADP<sup>+</sup> was removed from the AKR1C3 structure and only inhibitors were  
226 docked with AKR1C3 apoenzyme, the order did not change, but we could see  
227 considerable differences in their inhibitor binding location (Fig. 4A–C). MCFLA  
228 and MLS occupied the oxygen site composed by Tyr-55, His-117, and NADP<sup>+</sup>,  
229 while MPA was tightly bound to the steroid-binding site. In the NADP<sup>+</sup>-bound  
230 AKR1C3 model, the distance between the nitrogen atom of the nicotinamide ring  
231 of NADP<sup>+</sup> and the carbonyl oxygen of the inhibitors was consistent with the  
232 notion that MCFLA was closer to NADP<sup>+</sup> (~6.57 Å) than MPA (~7.68 Å). These  
233 results indicate that MPA is the best selective inhibitor of AKR1C3, while MCFLA  
234 partially interacts with the NADP<sup>+</sup> binding site, showing a relatively poor  
235 selectivity.

#### 236 4. Discussion

237           It has been reported that AKR1C enzymes are overexpressed in several  
238 cancer cell types, such as bladder cancer cells and gastric cancer cells,  
239 contributing to the resistance to Cis-platin treatment[2-6,11]. Some cytotoxic lipid  
240 peroxidative products have been mentioned as targets of AKR1Cs that are  
241 involved in Cis-platin resistance[6]. However, the role of AKR1Cs in the  
242 mechanism underlying Cis-platin resistance remains unclear. We found that  
243 AKR1C inhibitors could reverse resistance of HepG2-RC cells, even though  
244 AKR1Cs were not significantly upregulated in HepG2-RC cells. The effects of  
245 siAKR1Cs on HepG2-RC cells were comparable to those of the inhibitor MPA,

246 but could only partially explain the effects of MCFLA. This fact could be  
247 explained by that MPA is a steroid analog, which shows a high selectivity, while  
248 MCFLA inhibits not only AKR1C enzymes but also other AKR enzymes. MCFLA  
249 belongs to the class of non-steroid anti-inflammatory inhibitors, which have been  
250 reported to also inhibit cyclooxygenases besides AKR1Cs, indicating its poor  
251 selectivity[12]. As shown in Fig. 4D, all AKR enzymes share a common set of  
252 residues to bind NADP(H). As shown in Fig. 4B, MCFLA preferred the oxygen  
253 site rather than the steroid pocket, indicating that MCFLA inhibits AKR1C3 by  
254 disturbing NAD(P) (H) binding.

255 These results indicate that MCFLA could inhibit some other AKR enzymes  
256 besides AKR1Cs. This could explain why MCFLA causes a stronger reversal of  
257 Cis-platin resistance of HepG2-RC cells than MPA. It is likely that NAD(P)H plays  
258 a key role here because it is a reducing force and a product of NAD(P)H-  
259 dependent oxidoreductases. Reprogramming energy metabolism is considered  
260 as a hallmark of cancer cells in which NAD(P) or NAD(P)H levels are  
261 increased[13-15]. It has been reported that some NAD(P)H-dependent  
262 oxidoreductases, such as ALDHs, increase NAD(P)H levels in the cytosol of  
263 cancer cells, which then serves as an electron source[16].

264 We also found that the amount of total NAD (NAD<sup>+</sup>+NADH) in both HepG2  
265 and HepG2-RC cells was approximately four-fold higher than in HL-7702 cells.  
266 Moreover, the ratio of NADH/NAD<sup>+</sup> in HepG2-RC cells was increased as much

267 as seven-fold compared to HepG2 cells. The increased ratio could be explained  
268 by two steps (Fig. 5). First, NADH is produced continuously in hepatic cancer  
269 cells. This is in contrast to the situation in normal cells, where AKRs function as  
270 reductases[1]. However, the continuously biosynthesized NAD in hepatic cancer  
271 cells would make NAD(P)H-dependent enzymes catalyzing reactions in one  
272 direction, from NAD(P) to NAD(P)H. Second, the produced NAD(P)H would deal  
273 with Cis-platin-induced peroxidative products directly or indirectly. Usually,  
274 NADPH maintains glutathione at the reduced state, which could detoxify reactive  
275 oxygen species. However, this could not alter the NAD(P)H/NAD(P) ratio too  
276 much, because each reaction is reversible. It has also been reported that no  
277 alteration of resistance to Cis-platin or oxaliplatin occurred after GSH depletion  
278 in oxaliplatin-resistant human gastric adenocarcinoma TSGH cells[17],  
279 indicating GSH is not involved in the Cis-platin resistance.

280 Besides GSH, NAD(P)H could also react rapidly with moderately oxidizing  
281 radicals to repair biomolecules[18]. So, NAD(P)H could also work as a directly  
282 operating antioxidant that scavenges radicals as NAD(P)H\* forms. These forms  
283 would exist in the cell for a relatively long time and keep the intracellular  
284 concentration of free NAD(P)H very low. Therefore, NAD(P)H-dependent  
285 enzymes could catalyze NAD(P) to NAD(P)H continuously, resulting in a high  
286 ratio of NAD(P)H/NAD(P). If these enzymes were widely inhibited by a poor  
287 selective inhibitor, such as MCFLA, NADH would not accumulate anymore, and  
288 Cis-platin resistance would be suppressed as well.

289 In summary, it is believed that NAD(P)H-dependent oxidoreductases,  
290 especially AKRs, produce NADH in HepG2 cells to overcome Cis-platin-induced  
291 cytotoxicity. According to this notion, chemotherapy with inhibitors, which could  
292 compete with NAD(P) in most oxidoreductases, could lead to a better reversal  
293 of Cis-platin resistance in Cis-platin-resistant cancer cells.

#### 294 Acknowledgements

295 We thank LetPub ([www.letpub.com](http://www.letpub.com)) for its linguistic assistance during the  
296 preparation of this manuscript.

#### 297 Reference

298 [1] PENNING T M. The Aldo-Keto reductases (AKRs): overview[J]. CHEM  
299 BIOL Interact., 2015, 234: 236-246.

300 [2] SHIN-ICHI F, YAMAUCHI N, MORIGUCHI H, et al. Overexpression of  
301 the Aldo-Keto reductase family protein AKR1B10 is highly correlated with  
302 smokers' non-small cell lung carcinomas[J]. Clinical Cancer Research, 2005,  
303 11(5): 1776-1785.

304 [3] MICHAEL C B, MINDNICH R, PENNING T M. Overexpression of aldo-  
305 keto reductase 1C3 (AKR1C3) in LNCaP cells diverts androgen metabolism  
306 towards testosterone resulting in resistance to the 5-reductase inhibitor  
307 finasteride[J]. J Steroid Biochem MOL BIOL, 2012, 130(1): 7-15.

308 [4] RIZNER T L, SMUC T, PENNING T M, et al. AKR1C1 and AKR1C3 May  
309 determine progesterone and estrogen ratios in endometrial Cancer[J]. MOL Cell  
310 Endocrinol, 2006, 248(2): 126-135.

311 [5] CHIH-CHENG C, CHIA-BAO C, KO-JIUNN L, et al. Gene expression  
312 profiling for analysis acquired oxaliplatin resistant factors in human gastric  
313 carcinoma TSGH-S3 cells: The role of IL-6 signaling and Nrf2/AKR1C axis  
314 identification[J]. Biochemical Pharmacology, 2013, 86(7): 872 - 887.

315 [6] MATSUMOTO R, TSUDA M, SHINYA T, et al. Aldo-keto reductase 1C1  
316 induced by interleukin-1 $\beta$  mediates the invasive potential and drug  
317 resistance of metastatic bladder Cancer cells[J]. SCI REP, 2016, 6: 34625.

318 [7] BELLMUNT J, ALBIOL S, ALBANELL J, et al. Optimizing therapeutic  
319 strategies in advanced bladder Cancer: Update on chemotherapy and the role  
320 of targeted agents[J]. CRIT REV Oncol Hematol, 2009, 69(3): 211-222.

321 [8] LI Z, YAN X, YANG X. Expression of ADP-ribosyltransferase 1 Is  
322 Associated with Poor Prognosis of Glioma Patients[J]. Tohoku J EXP MED, 2016,  
323 239(4): 269-278.

324 [9] SONG G-I, JIN C-c, KUANG J, et al. Regulation of the  
325 RhoA/ROCK/AKT/ $\beta$ -catenin pathway by arginine-specific ADP-  
326 ribosyltransferases 1 promotes migration and epithelial-mesenchymal transition  
327 in colon carcinoma[J]. INT J Oncol, 2016, 49(2): 646-656.



- 328 [10] YANG L, XIAO M, WANG Y-I, et al. Arginine ADP-ribosyltransferase  
329 1 promotes angiogenesis in colorectal Cancer via the PI3K/Akt pathway[J]. INT  
330 J MOL MED, 2016, 37(3): 734-742.
- 331 [11] SHIRATO A, KIKUGAWA T, YOKOYAMA M, et al. Cisplatin  
332 resistance by induction of aldo-keto reductase family 1 member C2 in human  
333 bladder Cancer cells[J]. Oncol LETT, 2014, 7(3): 674-678.
- 334 [12] BROZIC P, TURK S, GOBEC S. Inhibitors of Aldo-Keto reductases  
335 AKR1C1-AKR1C4[J]. CURR MED CHEM, 2011, 18(17): 2554-2565.
- 336 [13] HANAHAN D, WEINBERG R. Hallmarks of Cancer: the next  
337 Generation[J]. Cell, 2011, 144(5): 646 - 674.
- 338 [14] CAIRNS R A, HARRIS I S, TAK W M. Regulation of Cancer cell  
339 metabolism[J]. NAT REV Cancer, 2011, 11(2): 85-95.
- 340 [15] AVRAHAM M. Mitochondrial function and energy metabolism in  
341 Cancer cells: Past overview and future perspectives[J]. Mitochondrion, 2009,  
342 9(3): 165 - 179.
- 343 [16] KIM S Y. Cancer energy metabolism: shutting power off Cancer  
344 factory[J]. Biomol THER (Seoul), 2018, 26(1): 39-44.
- 345 [17] CHEN C-c, CHEN L-t, CHANG J-y, et al. Combined modalities of  
346 resistance in an oxaliplatin-resistant human gastric Cancer cell line with

347 enhanced sensitivity to 5-fluorouracil[J]. BR J Cancer, 2007, 97(3): 334-344.

348 [18] KIRSCH M, DE GROOT H. NAD(P)H, a directly operating

349 antioxidant?[J]. Faseb J, 2001, 15(9): 569-574.

350 Figure Legends

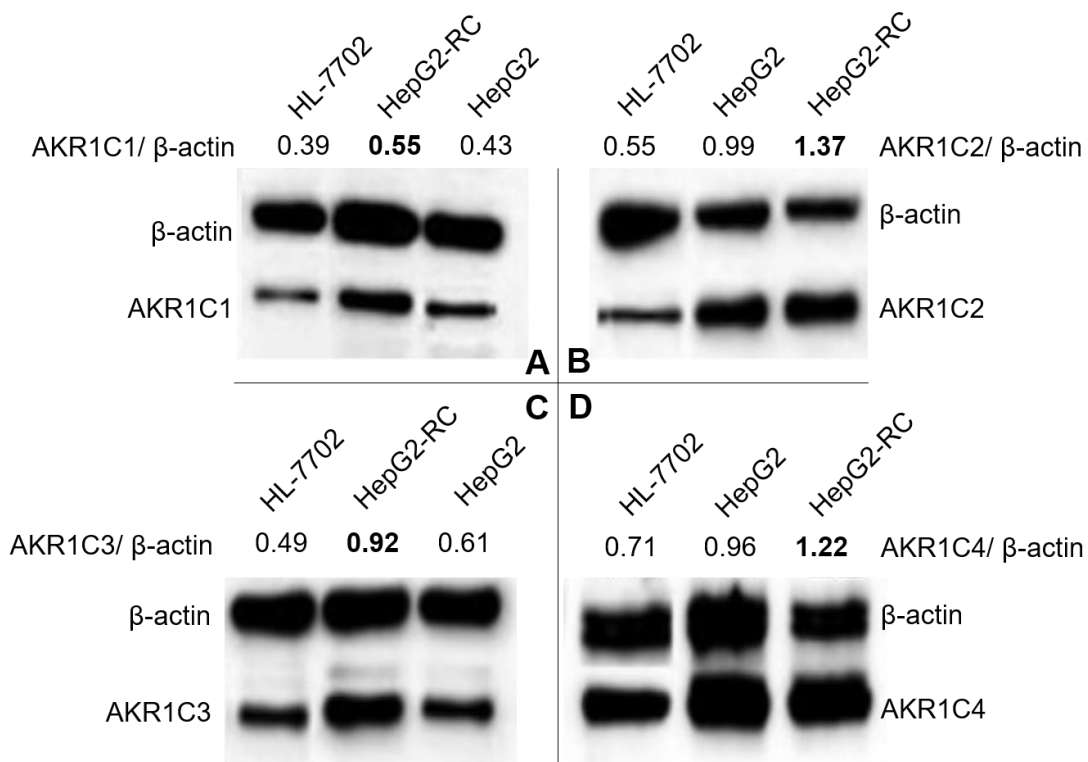

351

352 Fig. 1. Differential expression of AKR1Cs in hepatic cell lines HL-7702, HepG2,

353 and HepG2-RC, as measured with western blot. A, AKR1C1; B, AKR1C2; C,

354 AKR1C3; D, AKR1C4. β-actin was selected as an internal reference. The signal

355 intensity of each band was assessed with ImageJ software and divided by the

356 value of β-actin. The ratios of AKR1Cs and β-actin are shown at the top of the

357 figure.

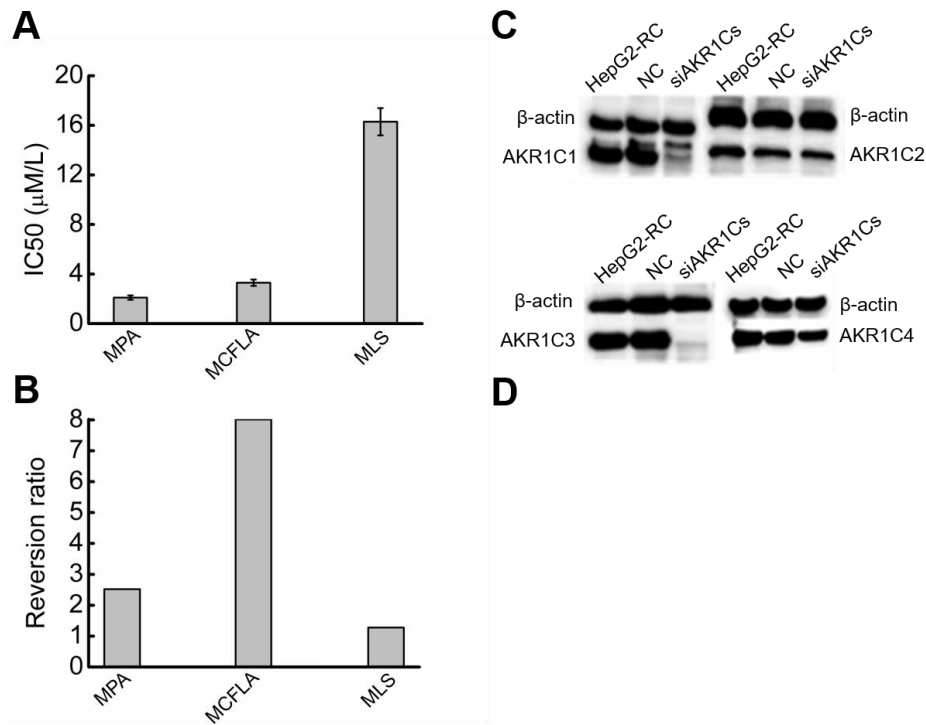

358

359 Fig. 2. Reversion of Cis-platin sensitivity in HepG2-RC. A, IC50 value of three  
 360 inhibitors acting on AKR1C3. MPA, medroxyprogesterone acetate; MCFLA,  
 361 meclufenamic acid; MLS, methylasmonate. B, Reversion ratio of Cis-platin  
 362 sensitivity in HepG2-RC cells caused by three inhibitors. C, Knockdown of  
 363 AKR1Cs by siRNA. Successful knockdown was confirmed with western blot. D,  
 364 Reversion of Cis-platin sensitivity in AKR1C knockdown cells.

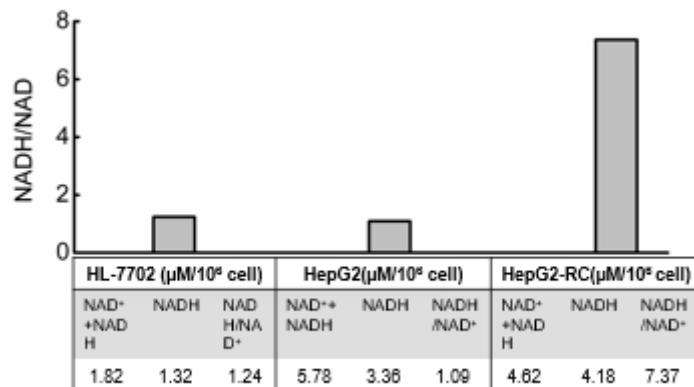

365



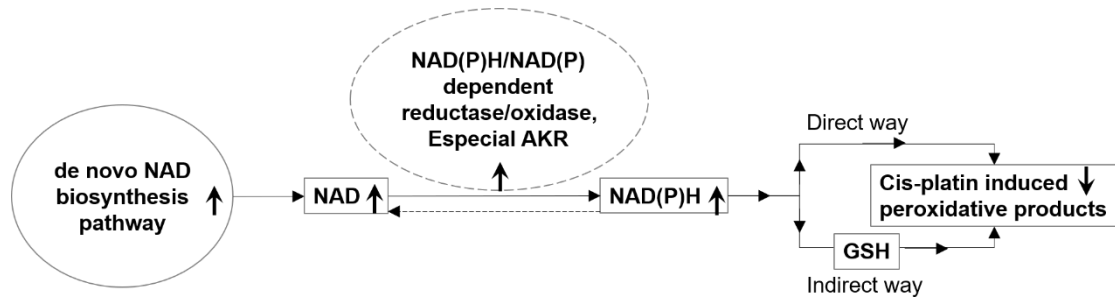

383

384 Fig. 5. A possible role of NAD(P)H/NAD(P)-dependent reductase/oxidase in the  
 385 mechanism underlying Cis-platin resistance. Arrows pointing upwards indicate  
 386 upregulation in HepG2-RC cells; arrows pointing downwards indicate  
 387 downregulation in HepG2-RC cells.

388 Table.1. The mRNA amount ( $2^{-\Delta Ct}$ ) of AKR1Cs in different hepatic cell lines  
 389 measured by qRT-PCR.

| Enzymes \ Cell lines | HL-7702 | HepG2             | HepG2-RC          |
|----------------------|---------|-------------------|-------------------|
| AKR1C1               | 10.3    | $3.1 \times 10^3$ | $0.3 \times 10^3$ |
| AKR1C2               | 6.8     | $0.3 \times 10^3$ | $0.1 \times 10^3$ |
| AKR1C3               | 16.1    | $6.1 \times 10^4$ | $2.9 \times 10^6$ |
| AKR1C4               | 4.6     | 6.6               | 1.6               |

390 Table.2. Regulation of AKR enzymes measured by RNA-seq.

| Gene    | $\log_2(\text{HepG2-RC}/\text{HepG2})$ | Annotation                                                                                                                                          |
|---------|----------------------------------------|-----------------------------------------------------------------------------------------------------------------------------------------------------|
| AKR1B10 | 3.12                                   | All-trans-retinol + NADP+ $\rightleftharpoons$ all-trans-retinal + NADPH                                                                            |
| AKR1B15 | 2.63                                   | L-Arabitol:NADP + 1-oxidoreductase L-Arabitol + NADP+ $\rightleftharpoons$ L-Arabinose + NADPH + H+                                                 |
| AKR1D1  | 2.16                                   | $5\beta$ -androstane-3,17-dione:NADP + 4,5-oxidoreductase $5\beta$ -Androstane-3,17-dione + NADP+ $\rightleftharpoons$ H+ + NADPH + Androstenedione |

|        |       |                                                                                                                   |
|--------|-------|-------------------------------------------------------------------------------------------------------------------|
| AKR1B1 | 2.14  | glycerol:NADP + oxidoreductase Glycerol + NADP+ <=> D-Glyceraldehyde + NADPH + H+                                 |
| AKR1C3 | 0.41  | NADP+ + trans-1,2-dihydrobenzene-1,2-diol <=> catechol + H+ + NADPH                                               |
| AKR6A5 | 0.21  | potassium voltage-gated channel subfamily A regulatory beta subunit 2                                             |
| AKR6A9 | 0.18  | potassium voltage-gated channel subfamily A regulatory beta subunit 3                                             |
| AKR7A3 | -0.02 | aflatoxin B1 + NAD(P)+ <=> aflatoxin B1-dialchol + NAD(P)H                                                        |
| AKR6A3 | -0.09 | potassium voltage-gated channel subfamily A regulatory beta subunit 1                                             |
| AKR1C1 | -0.43 | 17 $\alpha$ ,20 $\alpha$ -dihydroxypregn-4-en-3-one + NAD(P)+ <=> 17 $\alpha$ -hydroxypregesterone + H+ + NAD(P)H |
| AKR1C2 | -0.44 | 3 $\alpha$ -hydroxysteroid + NADP+ <=> 3-oxosteroid + H+ + NADPH                                                  |
| AKR7A2 | -0.55 | 4-hydroxybutanoate + NADP+ <=> H+ + NADPH + succinate semialdehyde                                                |
| AKR1A1 | -0.68 | allyl alcohol + NADP+ <=> acrolein + H+ + NADPH                                                                   |
| AKR7A4 | -0.94 | aflatoxin B1 + NAD(P)+ <=> aflatoxin B1-dialchol + NAD(P)H                                                        |
| AKR1E2 | -1.03 | testosterone:NAD+ 17-oxidoreductase Testosterone + NAD+ <=> Androstenedione + NADH + H+                           |
| AKR1C4 | -1.03 | Androsterone:NADP+ oxidoreductase Androsterone + NADP+ <=> 5 $\alpha$ -Androstane-3,17-dione + NADPH + H+         |

391 Table.3. Regulation of NAD metabolism related genes in HepG2 and HepG2-RC  
 392 measured by RNA-seq.

| Gene    | Log2(HepG2-RC/HepG2) | Annotation                                    |
|---------|----------------------|-----------------------------------------------|
| IDO1    | 0.06                 | indoleamine 2,3-dioxygenase 1                 |
| IDO2    | NA                   | indoleamine 2,3-dioxygenase 2                 |
| TDO2    | 3.97                 | tryptophan 2,3-dioxygenase                    |
| KMO     | -0.42                | kynurenine 3-monooxygenase                    |
| KYNU    | 2.78                 | kynureninase                                  |
| HAAO    | -0.03                | 3-hydroxyanthranilate 3,4-dioxygenase         |
| QPRT    | 0.076                | quinolinate phosphoribosyltransferase         |
| NMRK1   | 0.33                 | nicotinamide riboside kinase 1                |
| NMRK2   | NA                   | nicotinamide riboside kinase 2                |
| NMNAT1  | 0.06                 | nicotinamide nucleotide adenylyltransferase 1 |
| NMNAT2  | 5.31                 | nicotinamide nucleotide adenylyltransferase 2 |
| NMNAT3  | -0.23                | nicotinamide nucleotide adenylyltransferase 3 |
| Naprt   | -0.71                | nicotinate phosphoribosyltransferase          |
| NAMPT   | 0.83                 | nicotinamide phosphoribosyltransferase        |
| Nadsyn1 | 0.19                 | NAD synthetase 1                              |
| SIRT1   | -0.03                | sirtuin 1                                     |
| SIRT2   | 0.36                 | sirtuin 2                                     |
| SIRT3   | -0.63                | sirtuin 3                                     |

|        |       |                                    |
|--------|-------|------------------------------------|
| SIRT4  | -0.31 | sirtuin 4                          |
| SIRT5  | -0.13 | sirtuin 5                          |
| SIRT6  | -0.02 | sirtuin 6                          |
| SIRT7  | 0.058 | sirtuin 7                          |
| CD38   | -1.71 | CD38 molecule                      |
| CD157  | -0.11 | bone marrow stromal cell antigen 1 |
| PARP1  | -0.26 | poly(ADP-ribose) polymerase 1      |
| PARP2  | -0.61 | poly(ADP-ribose) polymerase 2      |
| PARP3  | 0.03  | poly(ADP-ribose) polymerase 3      |
| PARP4  | 0.48  | poly(ADP-ribose) polymerase 4      |
| PARP6  | -0.47 | poly(ADP-ribose) polymerase 6      |
| PARP8  | 0.19  | poly(ADP-ribose) polymerase 8      |
| PARP9  | 1.53  | poly(ADP-ribose) polymerase 9      |
| PARP10 | 0.95  | poly(ADP-ribose) polymerase 10     |
| PARP11 | NA    | poly(ADP-ribose) polymerase 11     |
| PARP12 | 0.95  | poly(ADP-ribose) polymerase 12     |
| PARP14 | 1.16  | poly(ADP-ribose) polymerase 13     |
| PARP15 | -0.12 | poly(ADP-ribose) polymerase 15     |
| PARP16 | -0.41 | poly(ADP-ribose) polymerase 16     |
| ART1   | 4.89  | ADP-ribosyltransferase 1           |
| ART3   | 1.14  | ADP-ribosyltransferase 3           |
| ART4   | 1.21  | ADP-ribosyltransferase 4           |
| ART5   | 3.51  | ADP-ribosyltransferase 5           |

393 Table.S1. The sequences of oligo nucleic acid used in qRT-PCR and Knock-  
 394 down experiment.

| Name      | Sequence                  | Usage          |
|-----------|---------------------------|----------------|
| AKR1C3-Fw | CATTGGGGGTGTCAAACCTTCA    | For qRT-PCR    |
| AKR1C3-Rv | CCGGTTGAAATACGGATGAC      | For qRT-PCR    |
| siAKR1Cs  | AACACCUGCACGUUCUGUCUGAUGC | For knock-down |
| siNC      | UUCUCCGAACGUGUCACGUTT     | For knock-down |

395

396 Table.S3. TOP 10 of upregulated genes in HepG2-RC compared to HepG2

| Gene | log2(HepG2-RC/HepG2) | Annotation |
|------|----------------------|------------|
|------|----------------------|------------|

|         |       |                                               |
|---------|-------|-----------------------------------------------|
| SPINK6  | 11.71 | serine peptidase inhibitor Kazal type 6       |
| TMEM140 | 9.87  | transmembrane protein 140                     |
| CLEC3A  | 8.93  | C-type lectin domain family 3 member A        |
| PSG2    | 8.81  | pregnancy specific beta-1-glycoprotein 2      |
| SLC6A15 | 8.24  | solute carrier family 6 member 15             |
| CLIC5   | 8.13  | chloride intracellular channel 5              |
| CASP14  | 8.05  | caspase 14                                    |
| CDH10   | 7.89  | cadherin 10                                   |
| BRINP3  | 7.77  | BMP/retinoic acid inducible neural specific 3 |
| DSC2    | 7.63  | desmocollin 2                                 |

397 Table.S4. TOP 10 of downregulated genes in HepG2-RC compared to HepG2.

| Gene         | log <sub>2</sub> (HPEG2-RC/HPEG2) | Annotation                                                      |
|--------------|-----------------------------------|-----------------------------------------------------------------|
| POTEJ        | -5.92                             | POTE ankyrin domain family member J                             |
| SPDEF        | -5.28                             | SAM pointed domain containing ETS transcription factor          |
| TCP10L       | -4.92                             | t-complex 10 like                                               |
| ARX          | -4.78                             | aristaless related homeobox                                     |
| PPP1R1B      | -4.67                             | protein phosphatase 1 regulatory inhibitor subunit 1B           |
| LOC107986354 | -4.55                             | uncharacterized                                                 |
| AGR2         | -4.52                             | anterior gradient 2, protein disulphide isomerase family member |
| CYP4Z1       | -4.49                             | cytochrome P450 family 4 subfamily Z member 1                   |
| BPIFA2       | -4.42                             | BPI fold containing family A member 2                           |
| NLRP9        | -4.35                             | NLR family pyrin domain containing 9                            |
